# Supplementary material for: Synthesis, spectroscopic characterisation and structure of the first chiral heteroleptic bis(phthalocyaninato) rare earth complexesElectronic supplementary information (ESI) available: 1H NMR spectrum of {SmIII(Pc)[Pc(OC5H11)4]}– in CDCl3/DMSO-d6 (1∶1) in the presence of a few drops of hydrazine hydrate. See http://www.rsc.org/suppdata/cc/b3/b301139a/
Source: Royal Society of Chemistry journal article supplement (doi:10.1039/b301139a), 2003-04-17

*Ms. Title:* Synthesis, spectroscopic characterisation and structure of the first chiral heteroleptic bis(phthalocyaninato) rare earth complexes

*Authors:* Y. Bian, R. Wang, J. Jiang, \* C.-H. Lee, J. Wang and D. K. P. Ng\*

$^1\text{H}$  NMR spectrum of  $\{\text{Sm}^{\text{III}}(\text{Pc})[\text{Pc}(\text{OC}_5\text{H}_{11})_4]\}^-$  in  $\text{CDCl}_3 / \text{DMSO-d}_6$  (1:1) in the presence of a few drops of hydrazine hydrate.

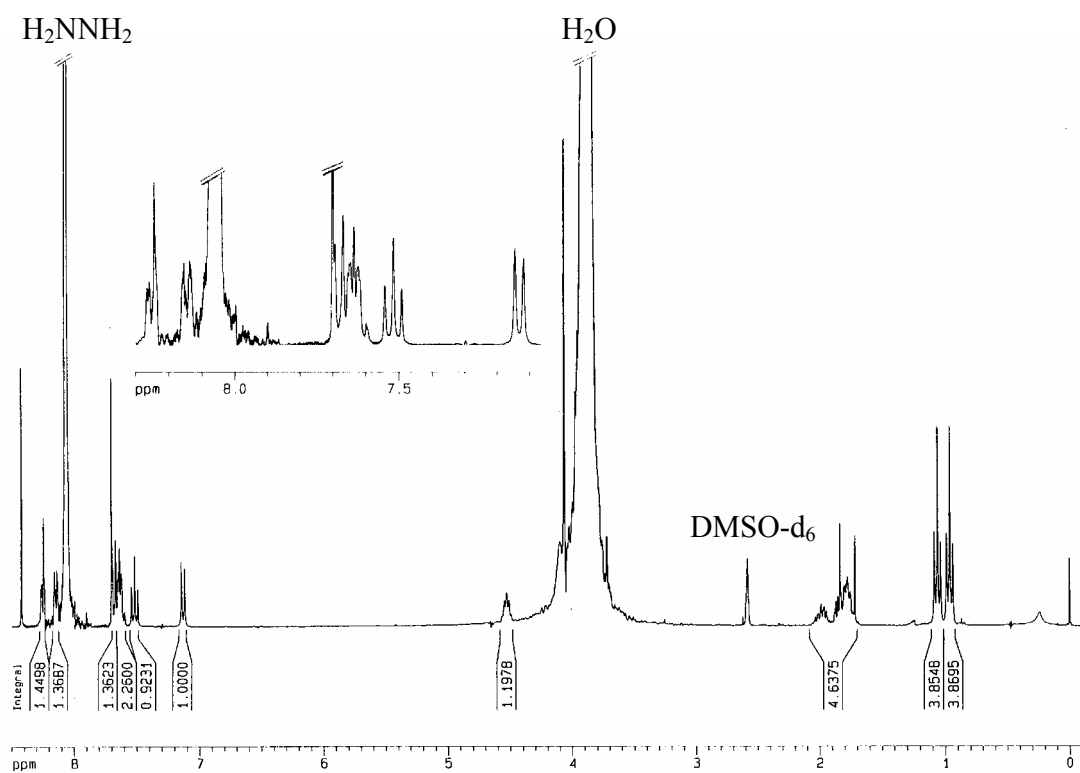

Supplement: b301139a.pdf [file b301139a.pdf]
